# Supplementary material for: Protein kinase N promotes cardiac fibrosis in heart failure by fibroblast-to-myofibroblast conversion
Source: PubMed Central journal article supplement — Nat Commun. 2024 Sep 12;15:7638. doi: 10.1038/s41467-024-52068-0 (PMC11392935; doi:10.1038/s41467-024-52068-0), 2024-09-12
Supplement: 41467_2024_52068_MOESM1_ESM.pdf [file 41467_2024_52068_MOESM1_ESM.pdf]

## Supplemental Information

### Protein kinase N promotes cardiac fibrosis in heart failure by fibroblast-to-myofibroblast conversion

Satoya Yoshida *et al.*

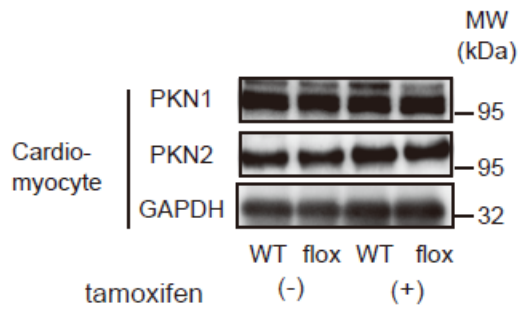

**Supplementary Figure 1. Cardiomyocytes in *Pdgfra*-protein kinase N (PKN) 1/2 knockout (KO) mice.** Western blot analysis for PKN1 and PKN2 was conducted in cardiomyocytes isolated from the heart of *Pdgfra*-PKN WT or KO mice after tamoxifen induction. GAPDH was used for control. The results represent three independent experiments.

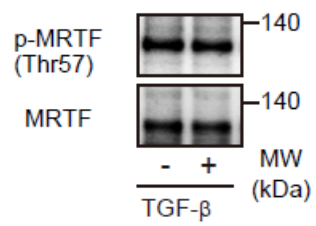

**Supplementary Figure 2. MRTFA phosphorylation.** Western blot analysis for MRTFA (Thr57) phosphorylation in cardiac fibroblasts. The results represent three independent experiments.

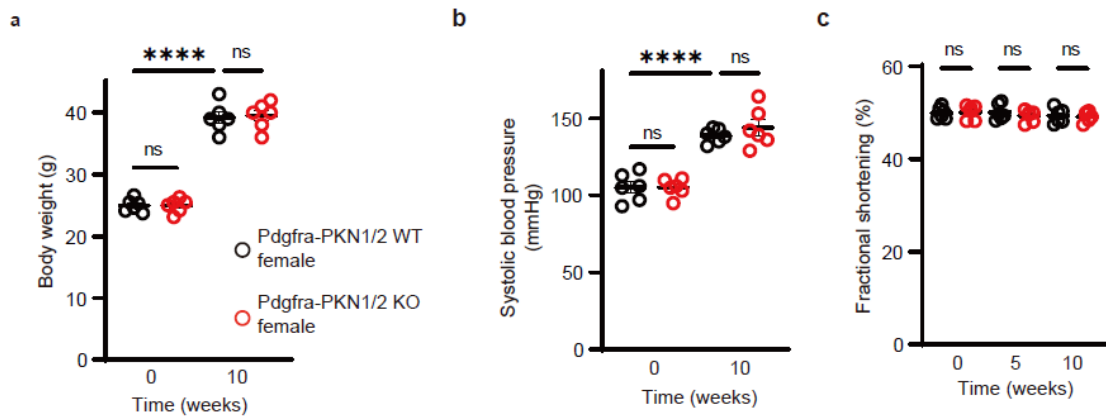

**Supplementary Figure 3. Fibroblast-specific PKN1/2 WT and KO female mice exposed to the combination of HFD and L-NAME.** (a) Body weight of mice from different experimental groups after 10 weeks of exposure ( $n = 6$ , biological replicates per group). ns, not significant; \*\*\*\* $p < 0.0001$ . (b) Systolic blood pressure ( $n = 6$ , biological replicates per group). ns, not significant; \*\*\*\* $p < 0.0001$ . (c) Fraction shortening examined using echocardiography ( $n = 6$ , biological replicates per group). ns, not significant. Data are presented as the mean  $\pm$  SEM and analyzed using two-way ANOVA followed by Tukey's post hoc test (a and b), or two-way repeated-measures ANOVA followed by Bonferroni post hoc test (c). The data represent three independent experiments with similar results.
